# Supplementary material
Source: publisher figshare collection journal article supplement (https://acs.figshare.com/ndownloader/files/5686314)
Supplement: Supplementary file 1 [file 5686314]

**Supplementary Material For ES&T Manuscript ES9808696: *Sequential Anaerobic Dechlorination Of Pentachlorophenol: Competitive Inhibition Effects And A Kinetic Model***

Victor S. Magar\*, H. David Stensel, Jaakko A. Puhakka, and John F. Ferguson

**TEM Examination of Biofilm Depth on the Celite® Support Matrix.**

Transmission electron microscope (TEM) studies were conducted to evaluate the thickness of the biofilm surrounding and contained within the spherical Celite® (World Minerals, Inc.; Lompoc, CA) particles in the FBRs. The Celite® used in these experiments (Type R-633) had a 30/50 mesh size (i.e., 80% of the particles are between 300 and 600  $\mu\text{m}$  in diameter) and a specific surface area of 1.3  $\text{m}^2/\text{g}$  (World Minerals, Inc.; Lompoc, CA).

Celite® particles from FBR-1 were prepared for examination by TEM by fixing the biomass with glutaraldehyde, followed by an osmium ( $\text{OsO}_4$ ) fix to enhance TEM resolution. The Celite® particles were suspended in 3% glutaraldehyde in reduced anaerobic medium (RAM) for 1 hour; RAM maintained ionic and anaerobic conditions. The glutaraldehyde-fixed Celite® particles were rinsed four times with RAM followed by a one-hour fix in 4%  $\text{OsO}_4$  in RAM. The samples were dehydrated with ethanol and dried with a Samdri-780 critical point dryer (Tousmins Research Corp, Rockville, NY).

The critical-point dried Celite®/biofilm particles were embedded in resin (Epon 812 resin; Electron Microscopy Sciences, PA), cut into thin sections (less than 100  $\text{\AA}$ ), and viewed with a Philips Electronics (NV Eindhoven, The Netherlands) CM 100 TEM, equipped with a model 690 wide-angle, slow-scan CCD camera (Gatan, Inc., Pleasanton, CA). Photographs were taken of two samples and are shown in Figures 1 through 4. The black areas represent Celite®; loss of Celite® occurred when the samples were cut due to its brittle characteristics, indicated by the white areas immediately surrounding the Celite®. Bacteria are located between the Celite® mass and are spherical or cylindrical in shape.

---

\* Corresponding author address Battelle, 505 King Avenue, Columbus, OH, 43201; tel: (614) 424-4604; fax: (614) 424-3667; e-mail: magarv@battelle.org.

Figures 1 and 2 show two photographs taken of a single Celite® particle, photographed at 5800 times magnification. Figure 1 shows the outer 15  $\mu\text{m}$  of biofilm Celite® particle, where all the pores appear to be occupied by bacteria. Figure 2 was taken from the same sample, deeper into the biofilm, and overlaps approximately 5  $\mu\text{m}$  with Figure 1. In Figure 2, the density of the bacteria is substantially reduced, showing that the bacteria did not significantly penetrate the Celite® particle beyond 15  $\mu\text{m}$  and most of the bacteria occupied the outer surface of the particle.

Figures 3 and 4 were taken from a second Celite® particle at 5800 and 10,500 times magnification, respectively. Similar to Figure 1, Figure 3 shows that the pore spaces in the outer 18  $\mu\text{m}$  of the particle are densely populated with bacteria. Figure 4 was taken approximately 100  $\mu\text{m}$  from the outer edge of the Celite® particle. Although bacteria are present, and in spite of the higher magnification, Figure 4 shows that the concentration of bacteria 100  $\mu\text{m}$  deep in the particle was much lower than in the outer 18  $\mu\text{m}$  shown in Figure 3. These results confirm that most of the bacteria occupied the outer surface of the Celite® particles. For the second particle, the density of bacteria dropped off at approximately 40  $\mu\text{m}$  from the outer edge of the particle.

Although the Celite® used in the FBRs had a reported specific surface area of 1.3  $\text{m}^2/\text{g}$  Celite®, the TEM results demonstrate that the entire surface area was not occupied by bacteria and that the bacteria tended to colonize the outer surface of the spherical Celite® particles. Based on empirical observation of numerous samples, the biofilm depth appeared to range from greater than 15  $\mu\text{m}$  to less than 50  $\mu\text{m}$ , suggesting a relatively thin biofilm in the FBRs.

A thin biofilm located on the outer surface of the Celite® particles should result in a relatively low biomass density in the FBRs. The total Celite® external surface area in the FBRs was calculated based on the following Celite® specifications provided by World Minerals, Inc. (Lompoc, CA).

- The interstitial pore volume for compact Celite® is 0.3758  $\text{cc/g}$  Celite®, and the total volume is 2.83  $\text{cc/g}$  Celite®; thus the Celite® volume excluding the interstitial pore volume but including the internal pore volume is 2.45  $\text{cc/g}$ .

- Assuming an average particle diameter of 0.45 mm (this equates to an average particle volume of  $4.77 \times 10^{-5}$  cc and external surface area of  $6.36 \times 10^{-3}$  cm<sup>2</sup>), the Celite® contained approximately 51,400 particles/g Celite® with an external surface of 327 cm<sup>2</sup>/g Celite®.
- On the basis of the above calculation, the specific surface area (1.3 m<sup>2</sup>/g Celite®) was approximately 40 times greater than the external surface area.

During the batch kinetic tests, the Celite® in the FBRs contained approximately 10 mg VS/g Celite®. Using the 327 cm<sup>2</sup> for the surface area, the VS concentration per unit surface area was or  $3.06 \times 10^{-2}$  mg VS/cm<sup>2</sup> Celite®. Assuming a biofilm density of 4% (40 g VS/L), the biofilm depth is calculated as follows:

$$\text{Depth, } L = \frac{0.0306 \text{ mg VS/cm}^2}{40 \text{ mg/cm}^3 \text{ VS}} = 7.6 \times 10^{-4} \text{ cm} = 7.6 \text{ } \mu\text{m}$$

The value of 7.6  $\mu\text{m}$  compares fairly well with the TEM. If the specific surface area (1.3 m<sup>2</sup>/g Celite®) were used instead of the calculated outer surface area of the particles, the calculated biofilm thickness would be approximately 0.2  $\mu\text{m}$ , which is significantly less than the TEM-measured thickness. This analysis confirms that the bacteria colonized the outer surface of the Celite® particles and not the internal pore surfaces, and that a thin biofilm (less than 50  $\mu\text{m}$ ) was present.

The fact that the biofilm occupied the outer surfaces of the Celite® particles and did not penetrate them indicates that the internal pores were not used optimally. It also suggests that diffusion limitations for CP diffusion into the Celite® particles could be ignored. Furthermore, because the biofilm was less than 50  $\mu\text{m}$ , a thin film could be and CP diffusion into the biofilm also could be ignored.

### List of Figures

Figure 1. Transmission electron micrograph of a Celite® particle from the outer surface to a depth of 15  $\mu\text{m}$ , with bacteria colonizing the pore spaces. Black regions are Celite® embedded into the resin; gray regions are pores that contain bacteria; white regions are regions that lost Celite® during cutting.

Figure 2. Transmission electron micrograph of a Celite® particle, beginning approximately 10  $\mu\text{m}$  from the outer surface to a depth of approximately 30  $\mu\text{m}$ . Same particle as Figure 1. Note that the bacteria did not significantly penetrate the Celite® particle.

Figure 3. Transmission electron micrograph of a Celite® particle, from the outer surface to a depth of approximately 18  $\mu\text{m}$ , with bacteria colonizing the pore spaces.

Figure 4. Transmission electron micrograph of same particle as Figure 3 at a magnification of 10,500 and 100  $\mu\text{m}$  from the outer edge of the Celite® particle.

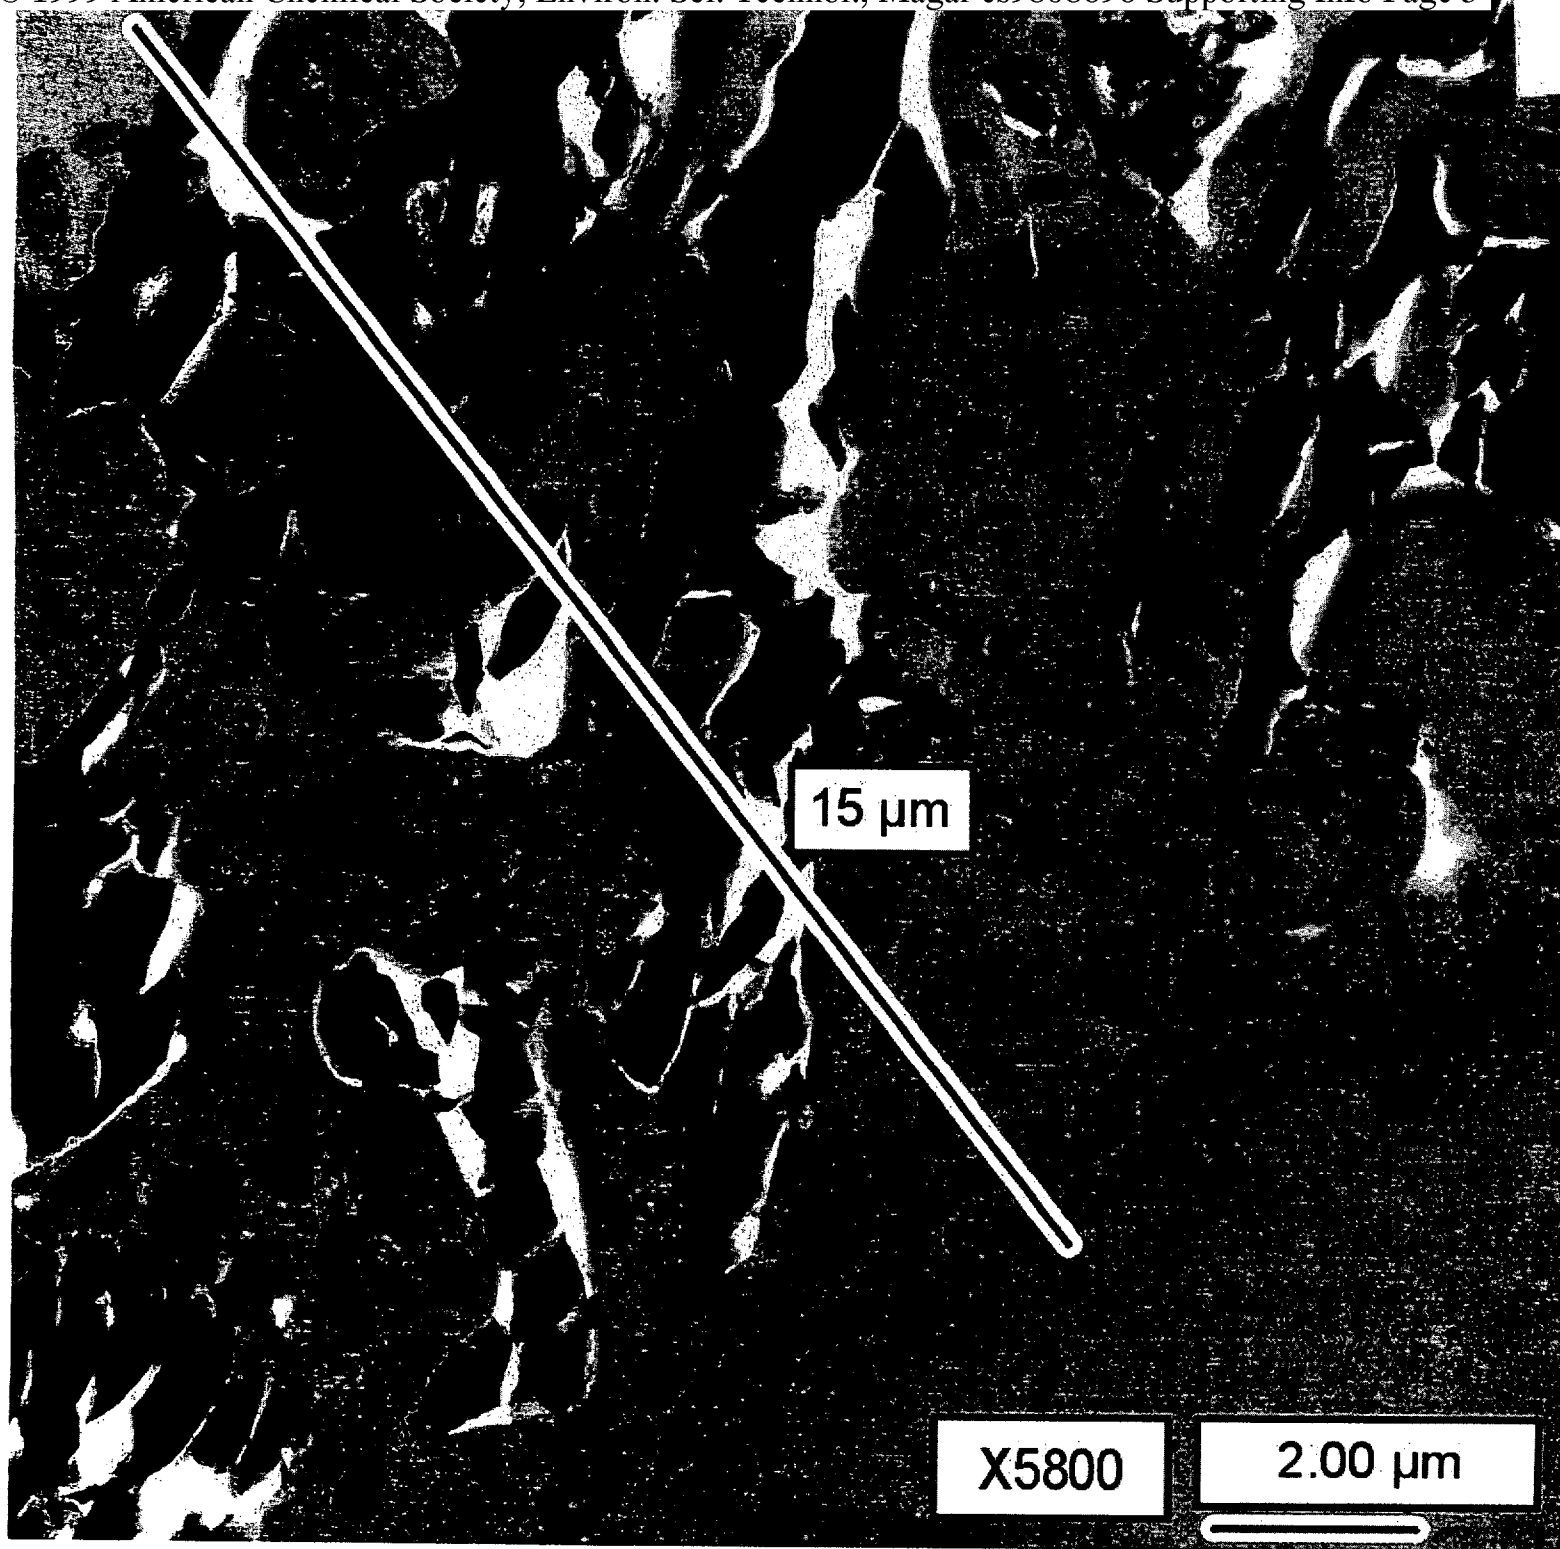

Figure 1. Transmission electron micrograph of a Celite® particle from the outer surface to a depth of 15 μm, with bacteria colonizing the pore spaces. Black regions are Celite® embedded into the resin; gray regions are pores that contain bacteria; white regions are regions that lost Celite® during cutting.

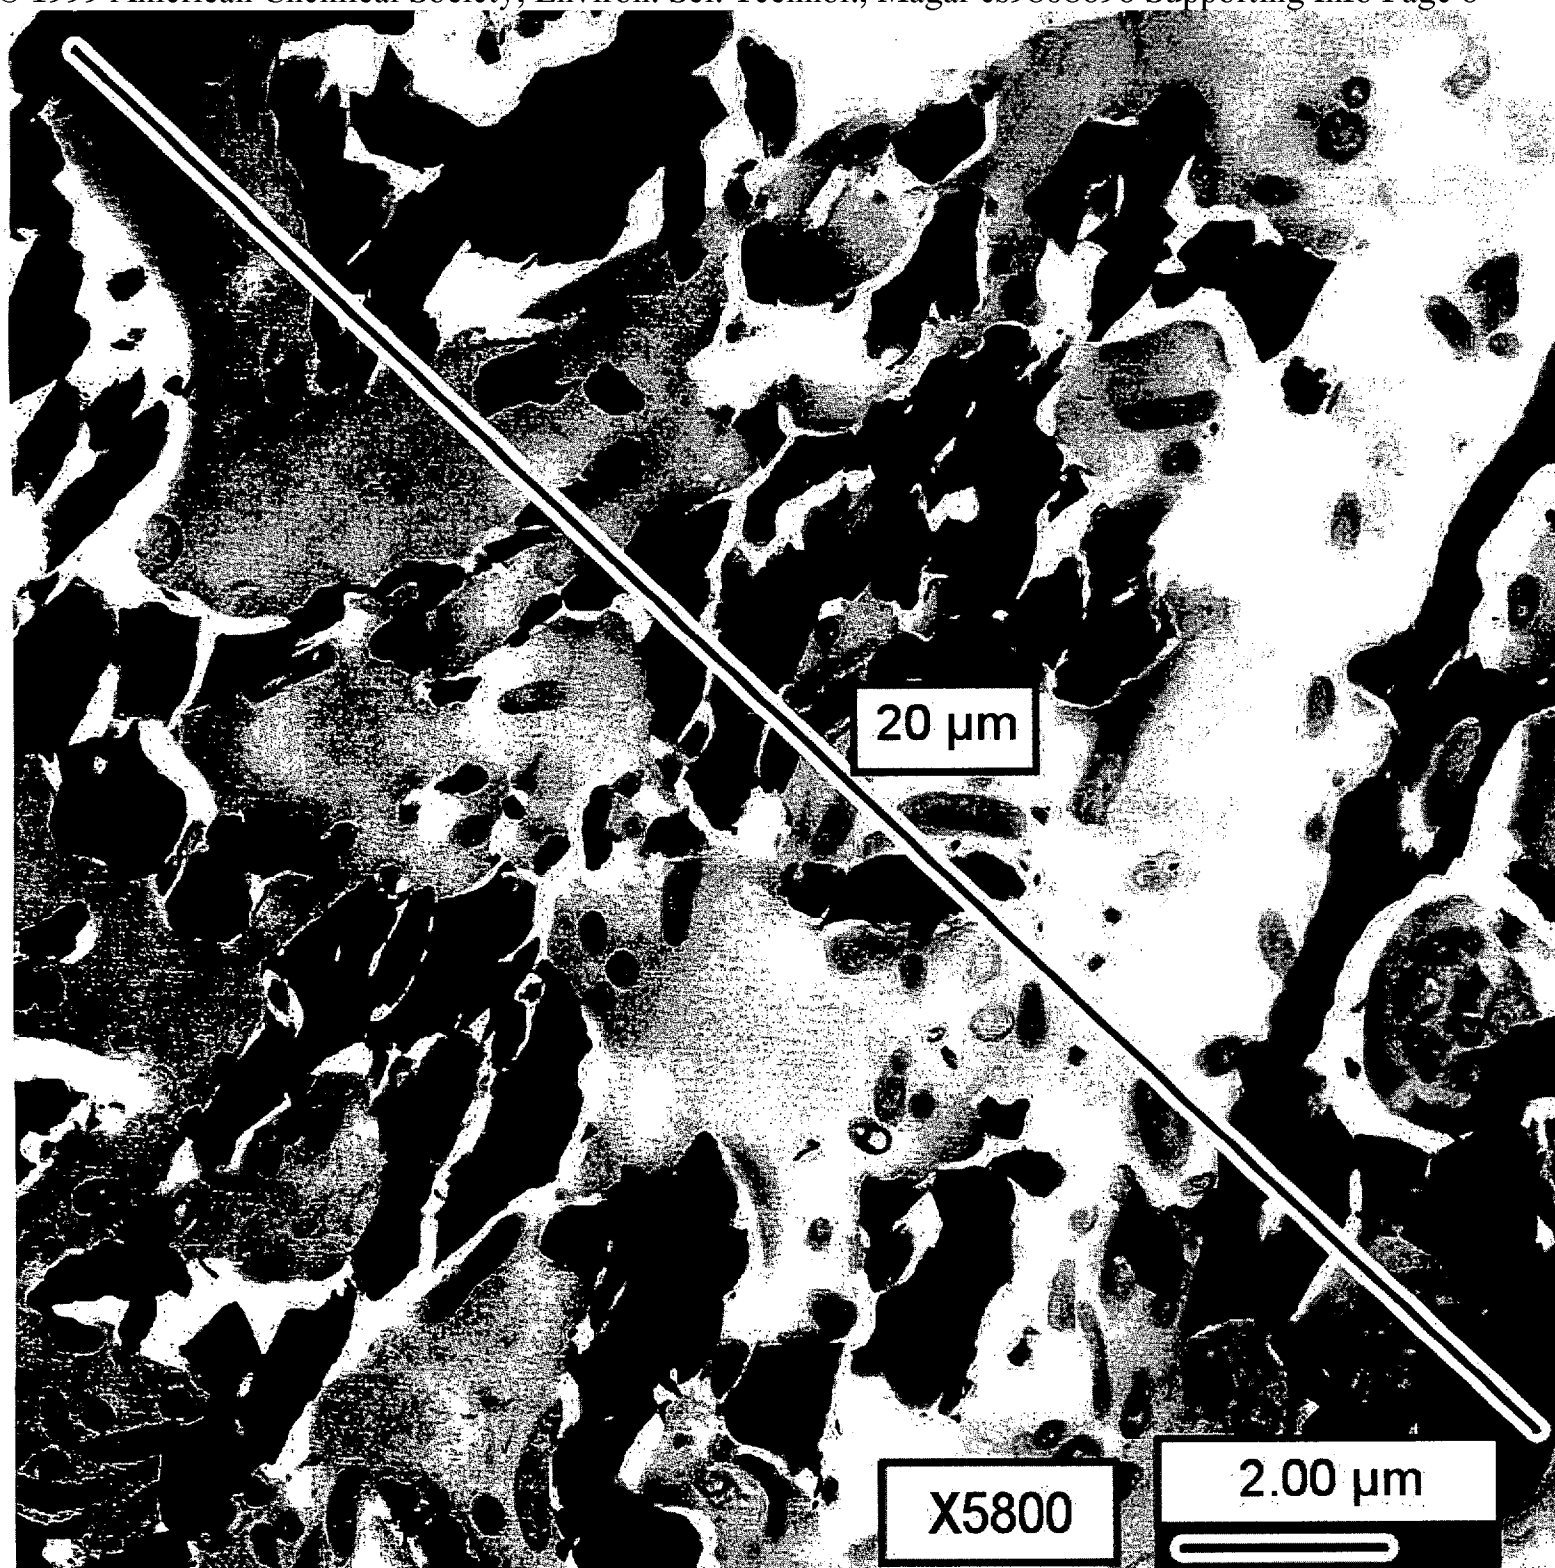

Figure 2. Transmission electron micrograph of a Celite® particle, beginning approximately 10 µm from the outer surface to a depth of approximately 30 µm. Same particle as Figure 1. Note that the bacteria did not significantly penetrate the Celite® particle.

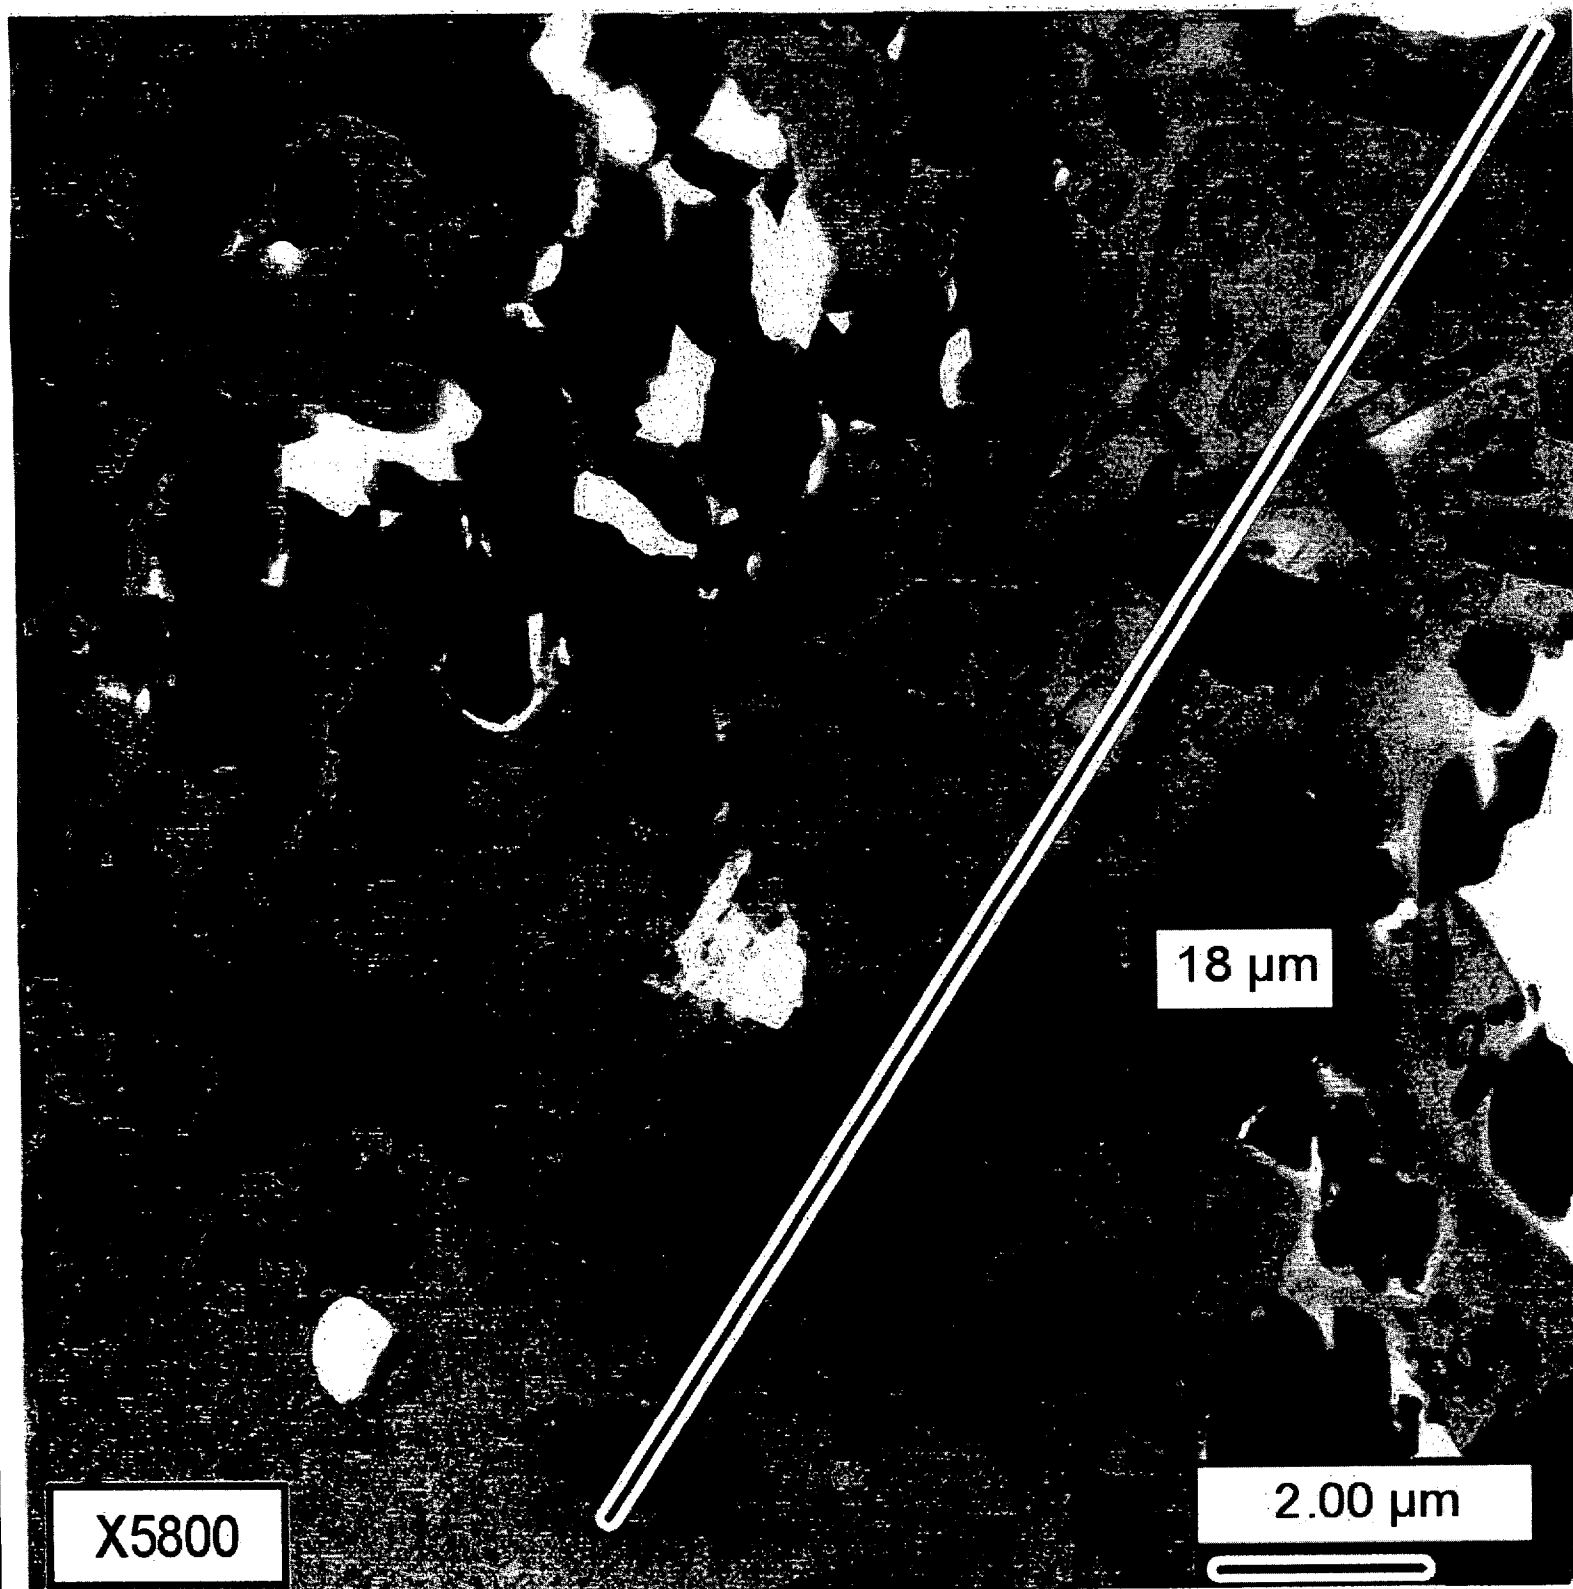

Figure 3. Transmission electron micrograph of a Celite® particle, from the outer surface to a depth of approximately 18 μm, with bacteria colonizing the pore spaces.

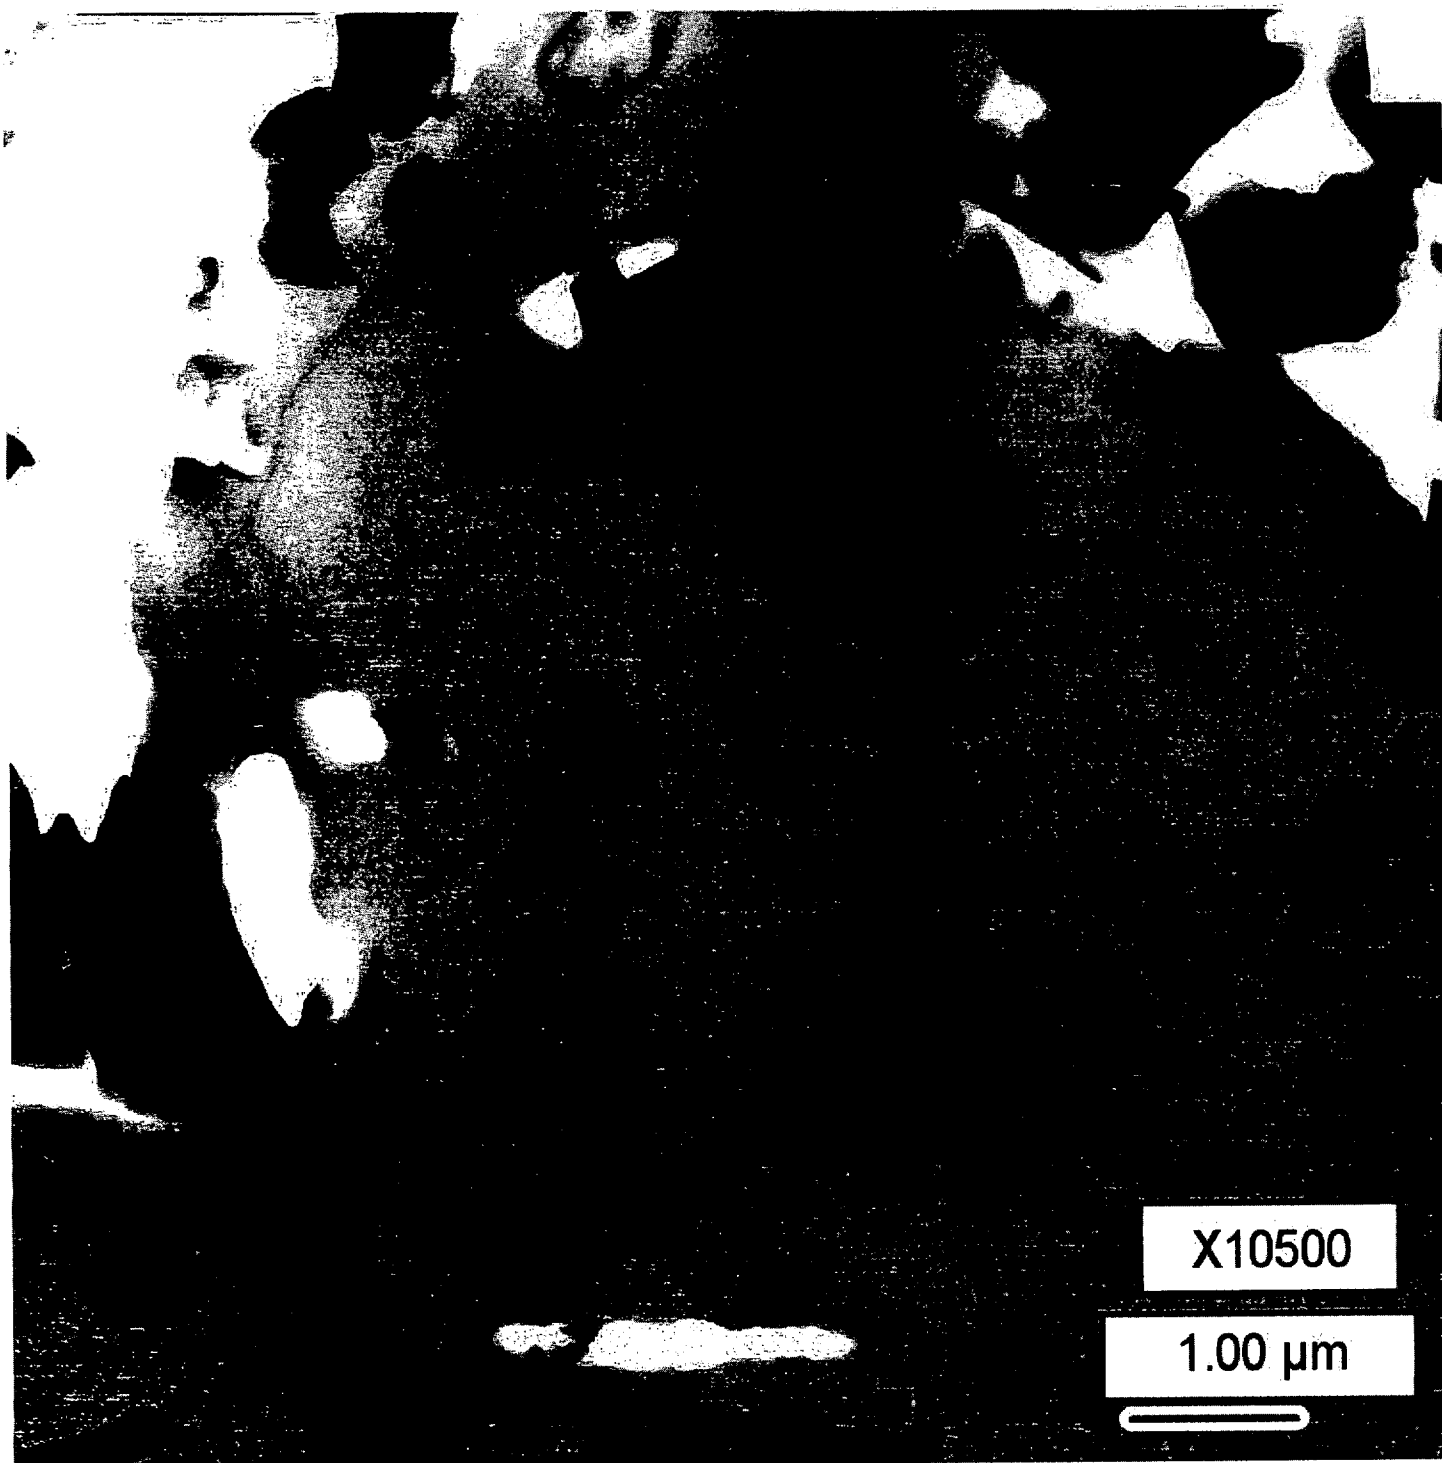

Figure 4. Transmission electron micrograph of same particle as Figure 3 at a magnification of 10,500 and 100 μm from the outer edge of the Celite® particle.
